# Supplementary material for: A New Method of Preparing Aurone by Marine Actinomycetes and Its Potential Application in Agricultural Fungicides
Source: MDPI journal article supplement (doi:10.3390/molecules28010017), 2022-12-20
Supplement: s1 [file s1]

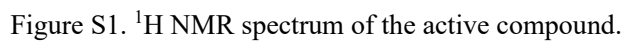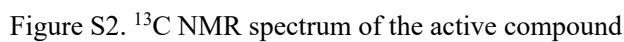



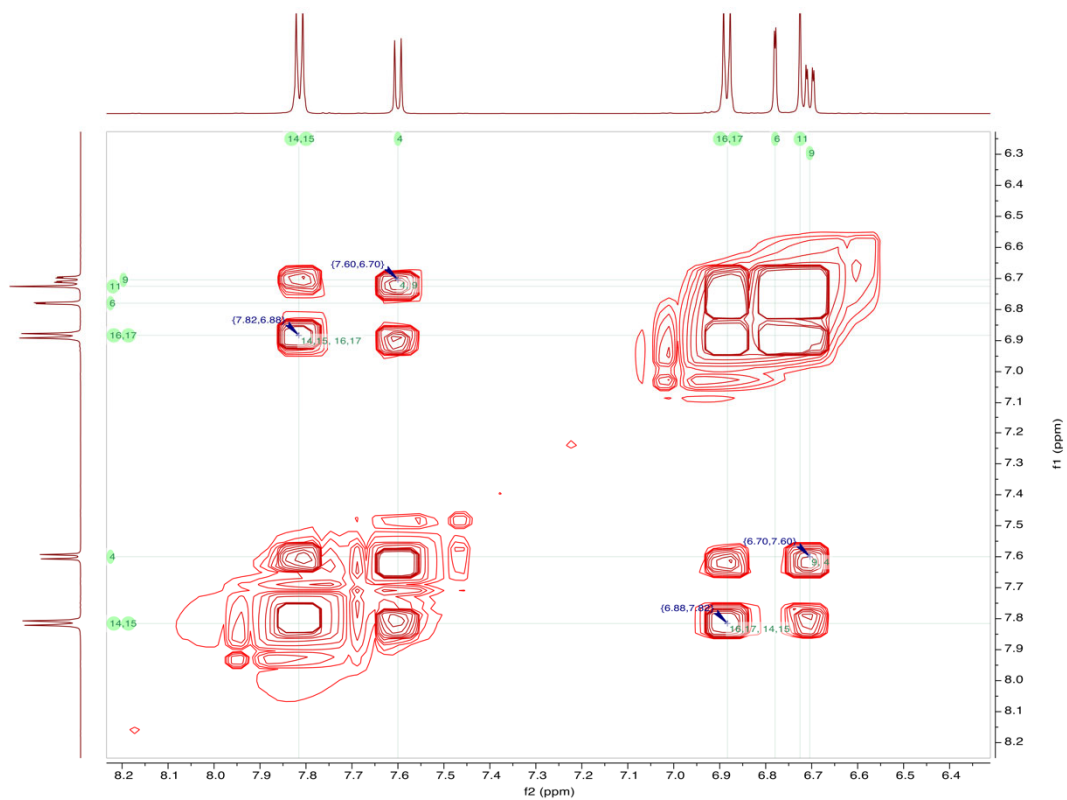

Figure S5.  $^1\text{H}$ - $^1\text{H}$  COSY spectrum of the active compound.

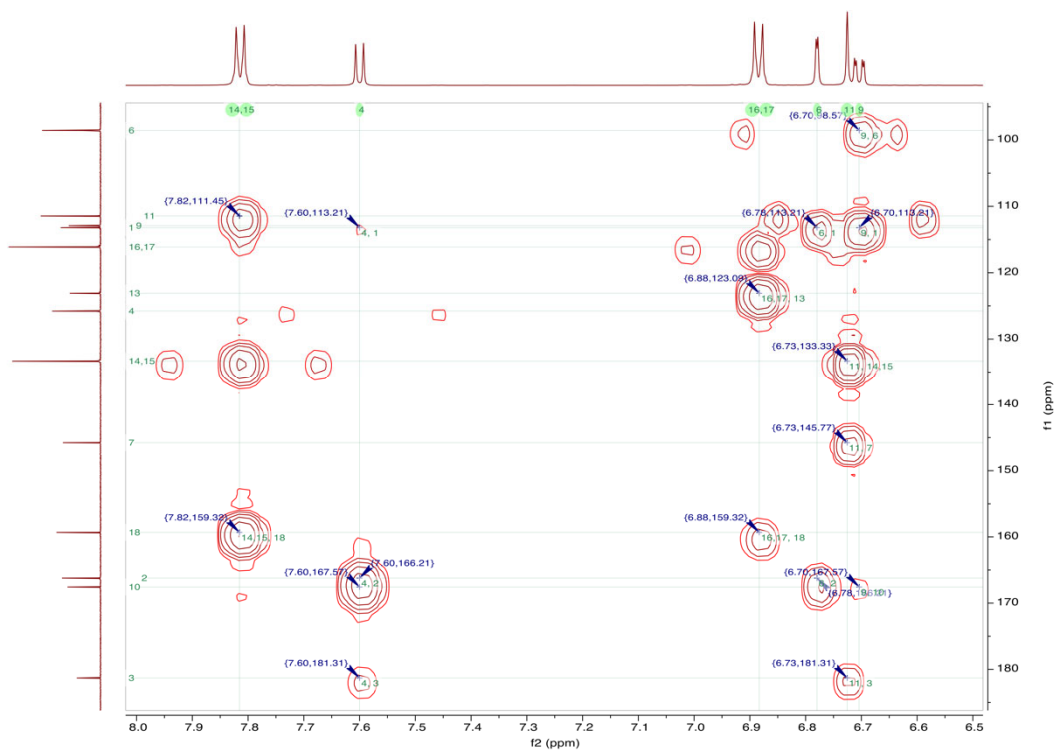

Figure S6. HMBC spectrum of the active compound.
